# Supplementary material for: A Monoclinic Semiorganic Molecular Crystal GUHP for Terahertz Photonics and Optoelectronics
Source: Research Square preprint supplement (doi:10.21203/rs.3.rs-833897/v1), 2021-10-18
Supplement: Supplementary file [file 103e706feb8dc43be0c41087.pdf]

## Supplementary materials for "A monoclinic semiorganic molecular crystal GUHP for terahertz photonics and optoelectronics"

### A Crystallographic characteristics, experimental data, and structure refinement parameters for GUHP

|                                                                                  |                                                                        |                                              |
|----------------------------------------------------------------------------------|------------------------------------------------------------------------|----------------------------------------------|
| Chemical formula                                                                 | $(NH_2)_2CNHCO(NH_2)H_2PO_3$ (GUHP)                                    |                                              |
| Space group, Z                                                                   | Cc, 4                                                                  |                                              |
| Temperature (K)                                                                  | 293                                                                    | 80                                           |
| a, b, c (Å)                                                                      | 6.6982(1), 6.8343(1), 16.3436(2)                                       | 6.6828(1), 6.7535(1), 16.2433(1)             |
| $\beta$ (deg)                                                                    | 96.5060(11)                                                            | 96.5183(8)                                   |
| V (Å <sup>3</sup> )                                                              | 743.351(18)                                                            | 728.358(12)                                  |
| D <sub>x</sub> (g/cm <sup>3</sup> )                                              | 1.645                                                                  | 1.679                                        |
| Radiation; $\lambda$ (Å)                                                         | MoK $\alpha$ ; 0.71069                                                 |                                              |
| $\mu$ (mm <sup>-1</sup> )                                                        | 0.355                                                                  |                                              |
| Diffractometer                                                                   | XtaLAB Synergy R, DW system, HyPix-Arc 150 Hybrid Pixel Array Detector |                                              |
| Scan mode                                                                        | $\omega$                                                               |                                              |
| T <sub>min</sub> , T <sub>max</sub>                                              | 0.906, 1.000                                                           | 0.956, 1.000                                 |
| $\theta_{max}$ (deg)                                                             | 72.96                                                                  | 73.03                                        |
| Ranges of indices h, k, l                                                        | -17 ≤ h ≤ 17;<br>18 ≤ k ≤ 15;<br>21 ≤ l ≤ 30                           | -17 ≤ h ≤ 17;<br>18 ≤ k ≤ 15;<br>29 ≤ l ≤ 21 |
| Numbers of reflections: measured/<br>unique, R <sub>av</sub> /<br>with I > 3σ(I) | 20921/<br>6093, 0.0094/<br>4865                                        | 20570/<br>5992, 0.0095/<br>5879              |
| R/wR                                                                             | 0.0224/0.0270                                                          | 0.0136/0.0176                                |
| S                                                                                | 1.51                                                                   | 1.26                                         |
| $\Delta\rho_{min}/\Delta\rho_{max}$ (e/Å <sup>3</sup> )                          | -0.17/0.25                                                             | -0.14/0.19                                   |
| Software                                                                         | CrysAlis, Jana2006                                                     |                                              |

## B THz TDS experimental set-ups

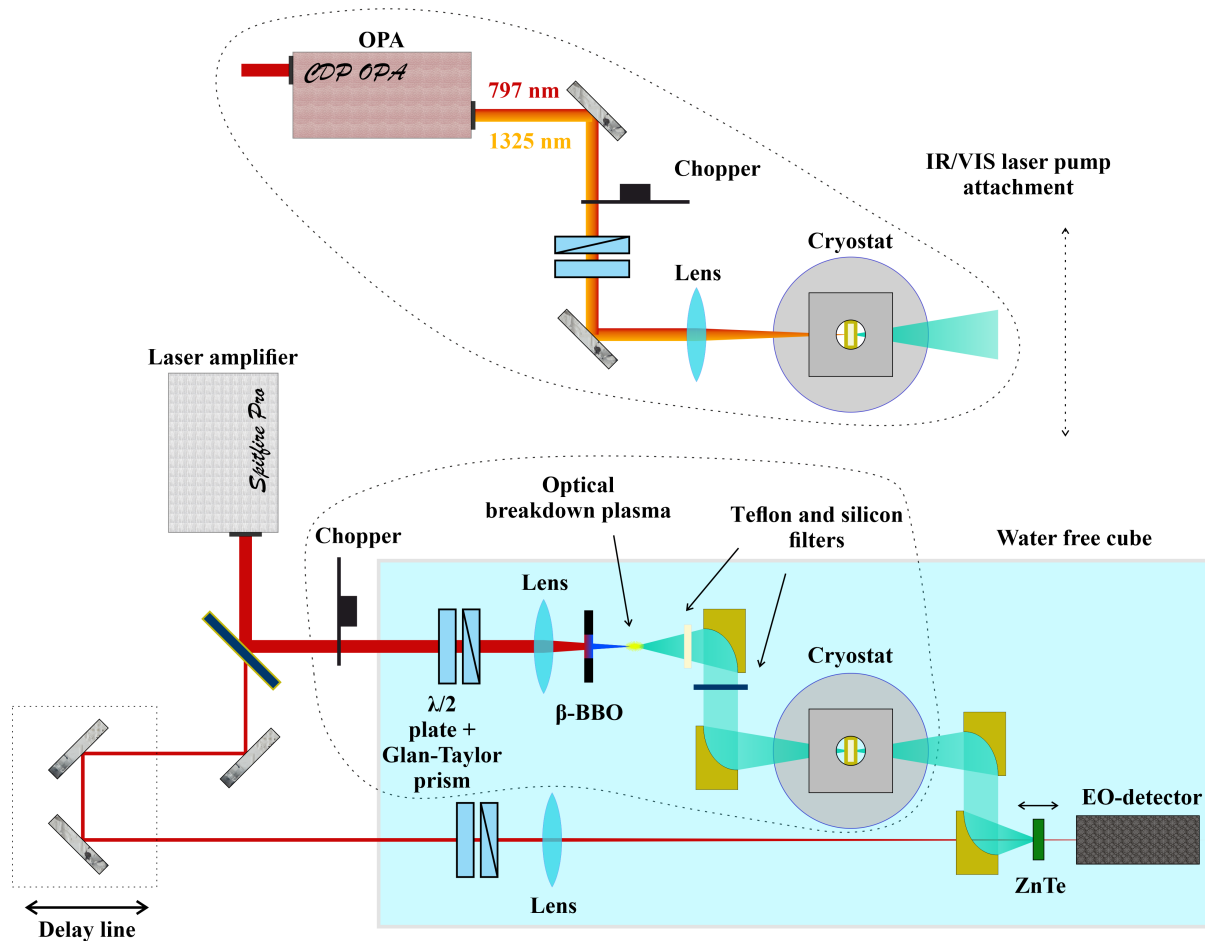

Experimental set-up of the THz time-domain spectrometer. An electro-optical system with a 1 mm thick ZnTe crystal was used as a detector of THz pulses. The effective spectral range recorded by this detector lies in the frequency range from 0.2 to 2.5 THz. A two-color optical breakdown plasma in air was used as a source of THz radiation. Cooling of the sample was carried out using a closed-cycle cryostat capable of cooling the sample to cryogenic temperatures. The pathway of the THz pulse was contained in a chamber filled with nitrogen gas, to reduce the attenuation of the THz signal by water vapor. For THz generation studies a Ti:sapphire regenerative amplifier or a two-stage optical parametric amplifier served to pump the crystal under study.

## C Optimized fractional coordinates of unique atoms in crystallographic cell

| T=293K |                     |                     |                     |
|--------|---------------------|---------------------|---------------------|
| Atom   | x/a                 | y/b                 | z/c                 |
| P      | 7.783194995031E-02  | 2.979536046701E-01  | -3.726918370565E-03 |
| O      | 2.192633737333E-01  | -8.460287645770E-04 | 2.314449298672E-01  |
| O      | 5.566233399350E-02  | 3.640167304342E-01  | 8.475227249509E-02  |
| O      | -2.278226857176E-02 | 4.575972018217E-01  | -6.924361388609E-02 |
| O      | -2.051383231520E-01 | -2.393391109907E-01 | -2.525308054349E-02 |
| C      | 8.001834488150E-02  | -5.515498687531E-02 | 1.794965414928E-01  |
| C      | -1.819599618401E-01 | 1.158257194800E-02  | 2.675709804859E-01  |
| N      | 1.122214410730E-01  | -1.293526101573E-01 | 1.061768811277E-01  |
| N      | -1.196087924325E-01 | -4.353435648696E-02 | 1.943903528724E-01  |
| N      | -5.192025702842E-02 | 6.102875738129E-02  | 3.316355772571E-01  |
| N      | -3.769774380518E-01 | 1.251544571394E-02  | 2.731578939548E-01  |
| H      | -4.825602722832E-01 | -2.145103406766E-02 | 2.252878471916E-01  |
| H      | 6.996630539812E-02  | -4.648599463623E-01 | 3.289981922460E-01  |
| H      | 9.552877689309E-02  | 6.459978213627E-02  | 3.206989587201E-01  |
| H      | -1.038381706878E-01 | 1.212613102957E-01  | 3.829765803825E-01  |
| H      | 2.596403901629E-01  | -1.400735813262E-01 | 9.570878057505E-02  |
| H      | -6.826971323308E-04 | -1.808176435311E-01 | 6.396711155089E-02  |
| H      | -2.342935625782E-01 | -8.723515219589E-02 | 1.489745085504E-01  |
| H      | 3.972149044754E-01  | 7.270295035043E-02  | -4.775269239534E-02 |
| H      | -3.627607680311E-02 | 1.257764878655E-01  | -2.295110357407E-02 |
| T=80K  |                     |                     |                     |
| Atom   | x/a                 | y/b                 | z/c                 |
| P      | 7.971802851065E-02  | 3.075947326493E-01  | -3.687772464463E-03 |
| O      | 2.183317638878E-01  | -1.156227578811E-03 | 2.318423178037E-01  |
| O      | 5.693567614008E-02  | 3.705242145627E-01  | 8.450422770062E-02  |
| O      | -1.788265312925E-02 | 4.685771521231E-01  | -6.817424118978E-02 |
| O      | -2.039345497479E-01 | -2.311822881604E-01 | -2.501582796014E-02 |
| C      | 7.921298911157E-02  | -5.213351516125E-02 | 1.797004272560E-01  |
| C      | -1.824388844993E-01 | 9.842230594181E-03  | 2.677713766923E-01  |
| N      | 1.111933880774E-01  | -1.216050927043E-01 | 1.061257744363E-01  |
| N      | -1.201894391748E-01 | -4.146108072869E-02 | 1.946118069061E-01  |
| N      | -5.256484477930E-02 | 5.569922454197E-02  | 3.318817695645E-01  |
| N      | -3.772068845019E-01 | 1.085145378083E-02  | 2.733414672818E-01  |
| H      | -4.828170765081E-01 | -2.048329828412E-02 | 2.255390630505E-01  |
| H      | 7.033380838953E-02  | -4.703303291787E-01 | 3.291581437311E-01  |
| H      | 9.469662056301E-02  | 5.892747536893E-02  | 3.210762372703E-01  |
| H      | -1.040132137819E-01 | 1.136424464643E-01  | 3.833297363902E-01  |
| H      | 2.582682224979E-01  | -1.318961138834E-01 | 9.563118581939E-02  |
| H      | -1.487420410417E-03 | -1.707013309091E-01 | 6.368956165037E-02  |
| H      | -2.346719415502E-01 | -8.258706742614E-02 | 1.490244776776E-01  |
| H      | 4.011127374634E-01  | 8.117203965744E-02  | -4.689727116071E-02 |
| H      | -3.629632655818E-02 | 1.390579251086E-01  | -2.403846045572E-02 |
